# Supplementary material
Source: Research Square preprint supplement (doi:10.21203/rs.3.rs-9865633/v1)
Supplement: Supplementary file 1 [file 096da37d9b1ac40cb346a769.docx]

# **Supplementary Material C: GRADE Evidence Profile**

**Question:** What is the directional distribution of incipient temporomandibular joint disc displacements in pre-orthodontic adolescents?

**Setting:** Pre-orthodontic adolescent population (mean age 10.8 years)

**Outcome:** Directional classification of incipient disc displacement

| Certainty assessment |  |  |  |  |  |  | Effect | Certainty |
| --- | --- | --- | --- | --- | --- | --- | --- | --- |
| **No. of studies** | **Study design** | **Risk of bias** | **Inconsistency** | **Indirectness** | **Imprecision** | **Other considerations** | **Pooled proportion (95% CI)** | **GRADE** |
| 1 | Cross-sectional | Serious¹ | Not applicable² | Serious³ | Serious⁴ | None | RAL: 43.4% (35.2-51.9) | ⊕◯◯◯ VERY LOW |

**Footnotes:**

¹ Moderate risk of bias (JBI score 7/11): Retrospective design, blinding unclear, confounding partially reported.

² Single study only; inconsistency cannot be assessed.

³ Single geographic region (Japan), single imaging center, prosthodontic referral population; generalizability limited.

⁴ Single study without replication; confidence intervals wide for some categories.

**GRADE interpretation:** The true directional distribution may be substantially different from the reported estimate. Future research is very likely to change the estimate.
