# Supplementary material
Source: Research Square preprint supplement (doi:10.21203/rs.3.rs-9865633/v1)
Supplement: Supplementary file 2 [file 68435590dc2b9a91652cf63a.docx]

# **Supplementary Material D: PubMed Search Strategy (Full Export)**

**Database:** PubMed (National Library of Medicine)

**Date executed:** March 31, 2026 (10:00 AM GMT)

**Search string:**

**("temporomandibular joint disorders"[MeSH] OR "TMJ"[tiab] OR "temporomandibular joint"[tiab]) AND ("disc displacement"[tiab] OR "disk displacement"[tiab] OR "internal derangement"[tiab] OR "disc position"[tiab]) AND ("magnetic resonance imaging"[MeSH] OR "MRI"[tiab]) AND ("adolescent"[MeSH] OR "child"[MeSH] OR "pediatric"[tiab] OR "paediatric"[tiab] OR "pre-orthodontic"[tiab]) AND ("coronal"[tiab] OR "sagittal"[tiab] OR "mediolateral"[tiab] OR "rotational"[tiab] OR "anterolateral"[tiab] OR "anteromedial"[tiab] OR "directional"[tiab])**

**Filters applied:**

- English language
- Human subjects

**Results:** 94 records

**Record list (first 20 of 94 for verification):**

| # | PMID | Citation |
| --- | --- | --- |
| 1 | 40450192 | Liu X, Long X. Classification of the temporomandibular joint disc displacement without reduction using MRI in the mouth-opening position. *Clin Oral Investig*. 2025 |
| 2 | 40675877 | Chen Y, Zhang X, Tang L, et al. Effect of sagittal position of the articular disc on condylar bone remodeling after disc repositioning surgeries in adolescents. *J Craniomaxillofac Surg*. 2025 |
| 3 | 37417053 | Yezdani A, Tajir F, Mohammed Jalal SM, et al. Magnetic resonance imaging assessment of articular disc position in temporomandibular disorder subjects with various bite registrations. *Indian J Dent Res*. 2023 |
| 4 | 25806865 | de Farias JF, Melo SL, Bento PM, et al. Correlation between temporomandibular joint morphology and disc displacement by MRI. *Dentomaxillofac Radiol*. 2015 |
| 5 | 12839406 | Emshoff R, Brandlmaier I, Gerhard S, et al. Magnetic resonance imaging predictors of temporomandibular joint pain. *J Am Dent Assoc*. 2003 |
| 6 | 26079691 | Yang X, Yao Z, He D, et al. Does Soft Tissue Injury Affect Intracapsular Condylar Fracture Healing? *J Oral Maxillofac Surg*. 2015 |
| 7 | 23724902 | Ikeda K. A reference line on temporomandibular joint MRI. *J Prosthodont*. 2013 |
| 8 | 11433854 | Bertram S, Rudisch A, Innerhofer K, et al. Diagnosing TMJ internal derangement and osteoarthritis with magnetic resonance imaging. *J Am Dent Assoc*. 2001 |
| 9 | 12465004 | Ueki K, Marukawa K, Nakagawa K, Yamamoto E. Condylar and temporomandibular joint disc positions after mandibular osteotomy for prognathism. *J Oral Maxillofac Surg*. 2002 |
| 10 | 24040949 | Goncalves JR, Wolford LM, Cassano DS, et al. Temporomandibular joint condylar changes following maxillomandibular advancement and articular disc repositioning. *J Oral Maxillofac Surg*. 2013 |
| 11 | 22560788 | Yu YH, Wang MH, Zhang SY, et al. Magnetic resonance imaging assessment of temporomandibular joint soft tissue injuries of intracapsular condylar fracture. *Br J Oral Maxillofac Surg*. 2013 |
| 12 | 11991461 | Emshoff R, Brandlmaier I, Bertram S, Rudisch A. Comparing methods for diagnosing temporomandibular joint disk displacement without reduction. *J Am Dent Assoc*. 2002 |
| 13 | 26825745 | Grossmann E, Remedi MP, Ferreira LA, Carvalho AC. Magnetic Resonance Image Evaluation of Temporomandibular Joint Osteophytes. *J Craniofac Surg*. 2016 |
| 14 | **26718376** | **Ikeda R, Ikeda K. Directional characteristics of incipient temporomandibular joint disc displacements: A magnetic resonance imaging study. *Am J Orthod Dentofacial Orthop*. 2016** ← **INCLUDED** |
| 15 | 38857693 | Chen B, Li C. The relationship between the articular disc in magnetic resonance imaging and the condyle in cone beam computed tomography. *J Stomatol Oral Maxillofac Surg*. 2024 |
| 16 | 10884644 | Nebbe B, Brooks SL, Hatcher D, et al. Magnetic resonance imaging of the temporomandibular joint: interobserver agreement in subjective classification of disk status. *Oral Surg Oral Med Oral Pathol Oral Radiol Endod*. 2000 |
| 17 | 29451403 | Matsubara R, Yanagi Y, Oki K, et al. Assessment of MRI findings and clinical symptoms in patients with temporomandibular joint disorders. *Dentomaxillofac Radiol*. 2018 |
| 18 | 23618835 | Jung WS, Kim H, Jeon DM, Mah SJ, Ahn SJ. Magnetic resonance imaging-verified temporomandibular joint disk displacement in relation to sagittal and vertical jaw deformities. *Int J Oral Maxillofac Surg*. 2013 |
| 19 | 28602259 | Rabelo KA, Sousa Melo SL, Torres MGG, et al. Assessment of condyle position, fossa morphology, and disk displacement in symptomatic patients. *Oral Surg Oral Med Oral Pathol Oral Radiol*. 2017 |
| 20 | 23851766 | Ma X, Fang B, Dai Q, et al. Temporomandibular joint changes after activator appliance therapy: a prospective magnetic resonance imaging study. *J Craniofac Surg*. 2013 |

**Full export available as separate file:** pubmed_search_2026-03-31.csv
