# Supplementary material
Source: Research Square preprint supplement (doi:10.21203/rs.3.rs-9865633/v1)
Supplement: Supplementary file 3 [file 7522f06385397187164777e8.docx]

# **Supplementary Material F: Complete List of Excluded Full-Text Articles with Reasons**

**Systematic Review:** Directional Characteristics of Incipient Temporomandibular Joint Disc Displacements

**Total full-text articles assessed:** 16

**Excluded articles:** 15

| # | Citation | Reason for exclusion |
| --- | --- | --- |
| 1 | Liu X, Long X. (2025). Classification of the temporomandibular joint disc displacement without reduction using MRI in the mouth-opening position. *Clin Oral Investig.* | No incipient stage reported separately; advanced DD only |
| 2 | Chen Y, et al. (2025). Effect of sagittal position of the articular disc on condylar bone remodeling after disc repositioning surgeries in adolescents. *J Craniomaxillofac Surg.* | Surgical population; not pre-orthodontic |
| 3 | Yezdani A, et al. (2023). Magnetic resonance imaging assessment of articular disc position in temporomandibular disorder subjects with various bite registrations. *Indian J Dent Res.* | Adult population (mean age 28.5 years) |
| 4 | de Farias JF, et al. (2015). Correlation between temporomandibular joint morphology and disc displacement by MRI. *Dentomaxillofac Radiol.* | No incipient stage reported separately |
| 5 | Emshoff R, et al. (2003). Magnetic resonance imaging predictors of temporomandibular joint pain. *J Am Dent Assoc.* | No directional classification for incipient DD |
| 6 | Yang X, et al. (2015). Does Soft Tissue Injury Affect Intracapsular Condylar Fracture Healing? *J Oral Maxillofac Surg.* | Trauma population; not pre-orthodontic |
| 7 | Bertram S, et al. (2001). Diagnosing TMJ internal derangement and osteoarthritis with magnetic resonance imaging. *J Am Dent Assoc.* | No directional classification for incipient DD |
| 8 | Ueki K, et al. (2002). Condylar and temporomandibular joint disc positions after mandibular osteotomy for prognathism. *J Oral Maxillofac Surg.* | Surgical population; not pre-orthodontic |
| 9 | Goncalves JR, et al. (2013). Temporomandibular joint condylar changes following maxillomandibular advancement and articular disc repositioning. *J Oral Maxillofac Surg.* | Surgical population; not pre-orthodontic |
| 10 | Yu YH, et al. (2013). Magnetic resonance imaging assessment of temporomandibular joint soft tissue injuries of intracapsular condylar fracture. *Br J Oral Maxillofac Surg.* | Trauma population; not pre-orthodontic |
| 11 | Grossmann E, et al. (2016). Magnetic Resonance Image Evaluation of Temporomandibular Joint Osteophytes. *J Craniofac Surg.* | Adult population; no incipient stage data |
| 12 | Chen B, Li C. (2024). The relationship between the articular disc in magnetic resonance imaging and the condyle in cone beam computed tomography. *J Stomatol Oral Maxillofac Surg.* | No incipient stage reported separately |
| 13 | Matsubara R, et al. (2018). Assessment of MRI findings and clinical symptoms in patients with temporomandibular joint disorders. *Dentomaxillofac Radiol.* | No directional classification for incipient DD |
| 14 | Jung WS, et al. (2013). Magnetic resonance imaging-verified temporomandibular joint disk displacement in relation to sagittal and vertical jaw deformities. *Int J Oral Maxillofac Surg.* | Adult population; no incipient stage data |
| 15 | Rabelo KA, et al. (2017). Assessment of condyle position, fossa morphology, and disk displacement in symptomatic patients. *Oral Surg Oral Med Oral Pathol Oral Radiol.* | No incipient stage reported separately |

**Note:** The single included study (Ikeda & Ikeda, 2016) is not listed above.
