# Supplementary material
Source: Research Square preprint supplement (doi:10.21203/rs.3.rs-9865633/v1)
Supplement: Supplementary file 4 [file 7b2bd64c092ee19af121ff4a.docx]

# **Supplementary Material I: Data Availability Statement**

**Systematic Review:** Directional Characteristics of Incipient Temporomandibular Joint Disc Displacements

**Author:** Maen Mahfouz, DDS, MSc

**Date:** March 31, 2026

## **Primary Data Sources**

| Source | Availability |
| --- | --- |
| Ikeda & Ikeda (2016) - original study | Published in *Am J Orthod Dentofacial Orthop*. DOI: 10.1016/j.ajodo.2015.06.021. Data available from journal. |
| PubMed search results (March 31, 2026) | Available as CSV export upon request from corresponding author |
| Cochrane Library search results (March 31, 2026) | Available as CSV export upon request from corresponding author |

## **No Primary Data Collected**

This systematic review did not involve:

- Collection of new patient data
- Ethical approval (not required for secondary research)
- Informed consent (not applicable)

## **Reproducibility**

All search strategies are fully reported in Supplementary Materials D and E. A future investigator re-executing the same search strings on the same databases on March 31, 2026, should obtain identical results (excluding normal database updates after this date).

## **Data Request Contact**

**Corresponding author:** Maen Mahfouz, DDS, MSc

**Email:** [clinicaiorthodontic@gmail.com](mailto:clinicaiorthodontic@gmail.com)

**Response time:** Within 7 business days
