# Supplementary material
Source: Research Square preprint supplement (doi:10.21203/rs.3.rs-9865633/v1)
Supplement: Supplementary file 5 [file 84e4833554a2eb5fb37f478b.docx]

# **Supplementary Material B: JBI Critical Appraisal Checklist (Completed Form)**

**Adapted JBI Checklist for Diagnostic Studies**

**Study assessed:** Ikeda & Ikeda (2016). *Directional characteristics of incipient temporomandibular joint disc displacements: A magnetic resonance imaging study.*

**Date of assessment:** March 31, 2026

**Assessor:** Maen Mahfouz

| # | Item | Yes | No | Unclear | Not applicable |
| --- | --- | --- | --- | --- | --- |
| 1 | Was the patient sample consecutive? | ✓ |  |  |  |
| 2 | Was data collection prospective? |  | ✓ |  |  |
| 3 | Was a valid reference standard used (MRI gold standard)? | ✓ |  |  |  |
| 4 | Were reference standard results interpreted without knowledge of index test? |  |  | ✓ |  |
| 5 | Were index test results interpreted without knowledge of reference standard? |  |  | ✓ |  |
| 6 | Did the study include an appropriate spectrum of patients (pre-orthodontic adolescents)? | ✓ |  |  |  |
| 7 | Was the diagnostic threshold pre-specified and acceptable? | ✓ |  |  |  |
| 8 | Were methods for performing the index test described in sufficient detail? | ✓ |  |  |  |
| 9 | Were relevant confounding factors reported (age, sex, side)? |  |  | ✓ (partial) |  |
| 10 | Were adverse events reported? |  |  |  | ✓ |
| 11 | Was sample size justified? |  | ✓ |  |  |

**Total score:** 7/11

**Overall risk of bias:** MODERATE
