# Supplementary material
Source: Research Square preprint supplement (doi:10.21203/rs.3.rs-9865633/v1)
Supplement: Supplementary file 6 [file b1066766995430ef43d42086.docx]

# **Supplementary Material H: List of Abbreviations**

| Abbreviation | Full form |
| --- | --- |
| ADD | Anterior disc displacement |
| ADDWoR | Anterior disc displacement without reduction |
| ADDWR | Anterior disc displacement with reduction |
| CBCT | Cone beam computed tomography |
| CENTRAL | Cochrane Central Register of Controlled Trials |
| CI | Confidence interval |
| CT | Computed tomography |
| DD | Disc displacement |
| DDR | Disc displacement with reduction |
| DDNR | Disc displacement without reduction |
| DDwoR | Disc displacement without reduction |
| GRADE | Grading of Recommendations, Assessment, Development and Evaluations |
| ID | Internal derangement |
| JBI | Joanna Briggs Institute |
| LPM | Lateral pterygoid muscle |
| MRI | Magnetic resonance imaging |
| OA | Osteoarthrosis |
| PAL | Partial anterior lateral |
| PAM | Partial anterior medial |
| PRISMA | Preferred Reporting Items for Systematic Reviews and Meta-Analyses |
| RAL | Rotational anterolateral |
| RAM | Rotational anteromedial |
| RDC/TMD | Research Diagnostic Criteria for Temporomandibular Disorders |
| SSRO | Sagittal split ramus osteotomy |
| TMD | Temporomandibular disorders |
| TMJ | Temporomandibular joint |
