# Supplementary material
Source: Research Square preprint supplement (doi:10.21203/rs.3.rs-9865633/v1)
Supplement: Supplementary file 8 [file e7eb757cde2b6f353d8cb689.docx]

# **Supplementary Material G: Data Extraction Form (Blank Template)**

**Systematic Review:** Directional Characteristics of Incipient Temporomandibular Joint Disc Displacements

**Instructions:** Use this form to extract data from each included study.

## **Part 1: Study Characteristics**

| Field | Response |
| --- | --- |
| Study ID |  |
| Author(s) |  |
| Year of publication |  |
| Journal |  |
| Country |  |
| Study design |  |
| Sample size (patients) |  |
| Sample size (TMJs) |  |
| Mean age (years) |  |
| Age range (years) |  |
| Sex distribution (M/F) |  |
| Population description |  |

## **Part 2: MRI Parameters**

| Field | Response |
| --- | --- |
| Field strength (T) |  |
| Sequences |  |
| Slice thickness (mm) |  |
| Planes acquired |  |
| Open/closed mouth positions |  |

## **Part 3: Definition of Incipient DD**

| Field | Response |
| --- | --- |
| Staging system used |  |
| Definition of Stage 1 |  |
| Reference for staging system |  |

## **Part 4: Directional Classification (Tasaki System or Equivalent)**

| Category | Count (n) | Percentage (%) |
| --- | --- | --- |
| Rotational anterolateral (RAL) |  |  |
| Partial anterior lateral (PAL) |  |  |
| Anterior (A) |  |  |
| Rotational anteromedial (RAM) |  |  |
| Medial (M) |  |  |
| Lateral (L) |  |  |
| Partial anterior medial (PAM) |  |  |
| Posterior (P) |  |  |
| **Total** |  |  |

## **Part 5: Subgroup Data (if available)**

### **Sex Differences**

| Directional type | Male (n= ) | Female (n= ) |
| --- | --- | --- |
| Anterior combined |  |  |
| Lateral combined |  |  |
| Medial combined |  |  |

### **Side Differences**

| Directional type | Right TMJs (n= ) | Left TMJs (n= ) |
| --- | --- | --- |
| Anterior combined |  |  |
| Lateral combined |  |  |
| Medial combined |  |  |

## **Part 6: Risk of Bias Assessment (JBI)**

| Item | Yes | No | Unclear | N/A |
| --- | --- | --- | --- | --- |
| 1. Consecutive patient enrollment? |  |  |  |  |
| 2. Prospective data collection? |  |  |  |  |
| 3. Valid reference standard? |  |  |  |  |
| 4. Reference standard blind to index? |  |  |  |  |
| 5. Index test blind to reference? |  |  |  |  |
| 6. Appropriate population spectrum? |  |  |  |  |
| 7. Acceptable diagnostic threshold? |  |  |  |  |
| 8. Sufficient description of methods? |  |  |  |  |
| 9. Confounding factors reported? |  |  |  |  |
| 10. Adverse events reported? |  |  |  |  |
| 11. Sample size justification? |  |  |  |  |
| **Total score** |  |  |  |  |
| **Risk of bias (Low/Moderate/High)** |  |  |  |  |

## **Part 7: Notes**

| Field | Response |
| --- | --- |
| Interobserver reliability (kappa) |  |
| Key limitations noted by authors |  |
| Additional comments |  |
| Data extractor initials |  |
| Date of extraction |  |

# **Supplementary Material H: List of Abbreviations**

| Abbreviation | Full form |
| --- | --- |
| ADD | Anterior disc displacement |
| ADDWoR | Anterior disc displacement without reduction |
| ADDWR | Anterior disc displacement with reduction |
| CBCT | Cone beam computed tomography |
| CENTRAL | Cochrane Central Register of Controlled Trials |
| CI | Confidence interval |
| CT | Computed tomography |
| DD | Disc displacement |
| DDR | Disc displacement with reduction |
| DDNR | Disc displacement without reduction |
| DDwoR | Disc displacement without reduction |
| GRADE | Grading of Recommendations, Assessment, Development and Evaluations |
| ID | Internal derangement |
| JBI | Joanna Briggs Institute |
| LPM | Lateral pterygoid muscle |
| MRI | Magnetic resonance imaging |
| OA | Osteoarthrosis |
| PAL | Partial anterior lateral |
| PAM | Partial anterior medial |
| PRISMA | Preferred Reporting Items for Systematic Reviews and Meta-Analyses |
| RAL | Rotational anterolateral |
| RAM | Rotational anteromedial |
| RDC/TMD | Research Diagnostic Criteria for Temporomandibular Disorders |
| SSRO | Sagittal split ramus osteotomy |
| TMD | Temporomandibular disorders |
| TMJ | Temporomandibular joint |
