# Supplementary material
Source: Research Square preprint supplement (doi:10.21203/rs.3.rs-9865633/v1)
Supplement: Supplementary file 9 [file fe8d4a7144b42180a3962b1d.docx]

# **Supplementary Material E: Cochrane Library Search Strategy (Full Export)**

**Database:** Cochrane Library (CENTRAL, Cochrane Database of Systematic Reviews)

**Date executed:** March 31, 2026 (10:00 AM GMT)

**Search string (simplified, Cochrane-compatible):**

**(TMJ or temporomandibular) and ("disc displacement" or "disk displacement" or "internal derangement") and (MRI or "magnetic resonance imaging") and (adolescent or child or pediatric) and (coronal or sagittal or rotational or anterolateral)**

**Results:** 5 records

**Record list:**

| # | Record ID | Citation | Type |
| --- | --- | --- | --- |
| 1 | CN-00389038 | Emshoff R, et al. (2002). Comparing methods for diagnosing temporomandibular joint disk displacement without reduction. *J Am Dent Assoc.* | Journal article (excluded) |
| 2 | CN-00438933 | Emshoff R, et al. (2003). Magnetic resonance imaging predictors of temporomandibular joint pain. *J Am Dent Assoc.* | Journal article (excluded) |
| 3 | CN-00575947 | Benbelaïd R, Fleiter B. (2006). Sensitivity and specificity of a new MRI method evaluating temporo-mandibular joint disc-condyle relationships. *Surg Radiol Anat.* | Journal article (excluded) |
| 4 | CN-01421264 | Iguchi R, et al. (2017). Comparison of temporomandibular joint and ramus morphology between class II and class III cases before and after bi-maxillary osteotomy. *J Craniomaxillofac Surg.* | Journal article (excluded) |
| 5 | CN-00921986 | Goncalves JR, et al. (2013). Temporomandibular joint condylar changes following maxillomandibular advancement and articular disc repositioning. *J Oral Maxillofac Surg.* | Journal article (excluded) |

**Full export available as separate file:** cochrane_search_2026-03-31.csv
